# Supplementary material
Source: publisher site journal article supplement (https://www.spandidos-publications.com/1569/downloadSupplementary)

Figure S1. Fluorescence microscope images of NF- $\kappa$ B p65 in RAW264.7 macrophages. Cells were pretreated with CAI (10, 20 and 40  $\mu$ M) or vehicle (0.1% DMSO) for 2 h prior to stimulation by 1  $\mu$ g/ml LPS for 1 h. They were then fixed and processed as described in section *Materials and methods*. Samples in each group were triplicate. Images were obtained using a Leica DM4000 upright fluorescence microscope and representative images from different group were shown. CAI, carboxyamidotriazole; NF, nuclear factor.

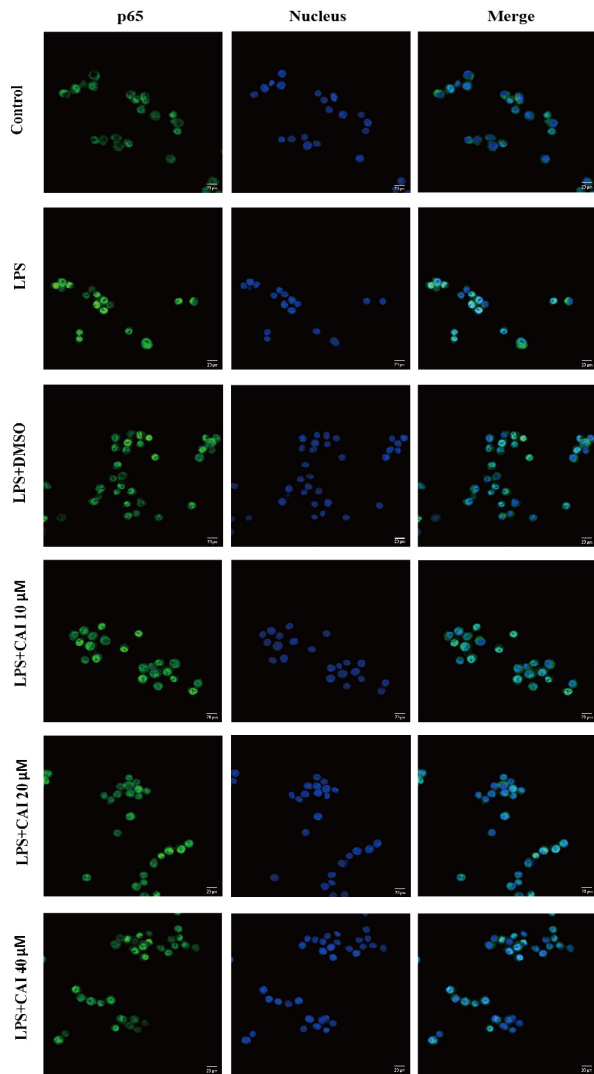

Figure S2. Immunofluorescence quantification of NF- $\kappa$ B p65 in Fig. S1. The pixel intensity of the immunostained p65 in the nucleus area was quantified using ImageJ software to assess the effect of CAI on p65 nuclear translocation. The values were normalized to 100% for the expression of control group. Data are presented as the mean  $\pm$  SD of three samples in each group. ##P<0.01 versus control group; \*P<0.05, \*\*P<0.01 versus LPS+DMSO group. LPS, lipopolysaccharide; CAI, carboxyamidotriazole; NF, nuclear factor.

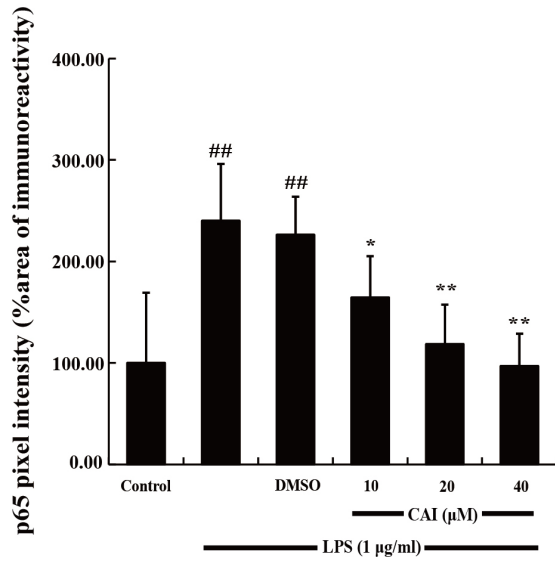

Supplement: Supplementary file 1 [file downloadSupplementary]
